# Supplementary material for: Added flavors: potential contributors to body weight gain and obesity?
Source: PubMed Central journal article supplement (PMC9623908; doi:10.1186/s12916-022-02619-3), 2022-11-01
Supplement: 12916_2022_2619_MOESM2_ESM.pdf [file 12916_2022_2619_MOESM2_ESM.pdf]

**Additional file 2.** Studies on feed with added flavors (intervention) as compared to unflavored feed (control) in animal experiments<sup>1</sup>

| Study type | First author Year (Ref.) | Animals in I and C groups | Species | Period of life   | Duration of I   | Added flavor tested                                                                          | Feed intake                       | Body weight gain | Final body weight | Further comments                                                                                                                                                                                           |      |
|------------|--------------------------|---------------------------|---------|------------------|-----------------|----------------------------------------------------------------------------------------------|-----------------------------------|------------------|-------------------|------------------------------------------------------------------------------------------------------------------------------------------------------------------------------------------------------------|------|
| 1          | De Rosa 2002 [41]        | Same                      | Goat    | 2 to 3 y         | 6 d within 14 d | Clover, Ryegrass                                                                             | ↑ <sup>a</sup>                    | n.p.             | n.p.              | <sup>a</sup> p < 0.001 for ryegrass in two of two sessions; p < 0.05 for clover in one of two sessions                                                                                                     |      |
|            | Khelil-Arfa 2021 [42]    | Same <sup>#</sup>         | Pony    | 4 to 13 y        | 5 d             | Anis, Apple, Caramel, Raspberry                                                              | ↑ <sup>a</sup>                    | n.p.             | n.p.              | <sup>a</sup> p < 0.05 only for apple                                                                                                                                                                       |      |
|            | Harper 2016 [43]         | Same <sup>#</sup>         | Cattle  | Lactation        | 6 d             | Anise, Fenugreek, Honey, Molasses, Orange, Thyme, Vanilla                                    | ↔                                 | n.p.             | n.p.              | Experiment not adequately controlled for strong effect of bin position and C feed not included on each day                                                                                                 |      |
|            | Seabolt 2010 [44]        | Same                      | Pig     | Post-weaning     | 2 d             | Creamy and milky cheese profile with sweet and vanilla bottom notes (Luctarom <sup>®</sup> ) | ↓ <sup>a</sup>                    | n.p.             | n.p.              | <sup>a</sup> p < 0.01                                                                                                                                                                                      |      |
| 2          | Thomas 2007 [45]         | Same <sup>†,#</sup>       | Cattle  | Calves           | 21 d (3x7 d)    | Orange, Vanilla added to water                                                               | ↑ <sup>a</sup>                    | ↑ <sup>b</sup>   | n.p.              | <sup>a</sup> p < 0.05; <sup>b</sup> p < 0.05 only for orange                                                                                                                                               |      |
|            |                          | Same <sup>†</sup>         |         | Second-lactation | 28 d (4x7 d)    | Orange added to water                                                                        | ↔                                 | n.d.             | n.p.              | -                                                                                                                                                                                                          |      |
|            | Wene 1982 [46]           | Same <sup>†,#</sup>       | Baboon  | 7 to 15 y        | 48 d            | Chocolate, Fruit punch, Lemon, Orange                                                        | (↑) <sup>a</sup>                  | n.d.             | n.p.              | <sup>a</sup> p = 0.052; The proportion of simple carbohydrates was different between flavored (25 %) and unflavored (5 %) chow which might bias the findings; Unflavored feed was also offered in I period |      |
|            |                          | Same <sup>†,#</sup>       |         |                  |                 | 48 d                                                                                         | Apple, Lemon, Orange, Sugar       | ↔                | n.d.              |                                                                                                                                                                                                            | n.p. |
|            |                          | Same <sup>†,#</sup>       |         |                  |                 | 185 d                                                                                        | Orange, Punch                     | ↑ <sup>a</sup>   | n.d.              |                                                                                                                                                                                                            | n.p. |
| 3          | Danielsen 1991 [47]      | Different                 | Pig     | Pre-weaning      | 14 d            | Cream, Strawberry                                                                            | ↑ <sup>a</sup> , (↑) <sup>b</sup> | ↔                | ↑ <sup>c</sup>    | <sup>a</sup> p < 0.05 for cream; <sup>b</sup> p ≤ 0.1 for strawberry; <sup>c</sup> p not given, 0.2 kg higher; <sup>d</sup> p not given,                                                                   |      |
|            |                          |                           |         | Post-weaning     | 21 d            |                                                                                              | ↑ <sup>a</sup> , (↑) <sup>b</sup> | ↑ <sup>a</sup>   | ↑ <sup>d</sup>    |                                                                                                                                                                                                            |      |

|                         |                        |        |               |        |                                                      |                                   |                                   |                  |                                                                                                                                                                                                    |
|-------------------------|------------------------|--------|---------------|--------|------------------------------------------------------|-----------------------------------|-----------------------------------|------------------|----------------------------------------------------------------------------------------------------------------------------------------------------------------------------------------------------|
|                         |                        |        | Entire period | 35 d   |                                                      | ↑ <sup>a</sup> , (↑) <sup>b</sup> | ↑ <sup>a,e</sup>                  | ↑ <sup>d</sup>   | 0.7 kg higher; <sup>e</sup> p < 0.05 for strawberry                                                                                                                                                |
| Yan 2011 [48]           | Different              | Pig    | Pre-weaning   | 17 d   | Cheese, Vanilla                                      | ↑ <sup>a</sup>                    | ↔                                 | n.d.             | <sup>a</sup> p < 0.05 only for cheese; <sup>b</sup> p < 0.05                                                                                                                                       |
|                         |                        |        | Post-weaning  | 7 d    |                                                      | ↔                                 | ↑ <sup>b</sup>                    | n.d.             |                                                                                                                                                                                                    |
| Wang 2014 [49]          | Different              | Pig    | Pre-weaning   | 21 d   | Fruit-milk, Fruit-milk-anis                          | ↑ <sup>a</sup>                    | ↔                                 | ↔                | <sup>a</sup> p < 0.05 only for fruit-milk-anis; <sup>b</sup> p < 0.01 only for fruit-milk-anis                                                                                                     |
|                         |                        |        | Post-weaning  | 8 d    |                                                      | ↑ <sup>b</sup>                    | ↑ <sup>b</sup>                    | ↔                |                                                                                                                                                                                                    |
| Adeleye 2014 [50]       | Different <sup>#</sup> | Pig    | Pre-weaning   | 19 d   | Apple, Apricot, Butterscotch, Red fruit, Toffee      | ↑ <sup>a</sup>                    | n.d.                              | ↔                | <sup>a</sup> p = 0.01                                                                                                                                                                              |
|                         |                        |        | Post-weaning  | 14 d   | -                                                    | ↔                                 | ↑ <sup>a</sup>                    | (↑) <sup>b</sup> | <sup>a</sup> p = 0.03; <sup>b</sup> p = 0.07                                                                                                                                                       |
| King 1979 [51]          | Different              | Pig    | Pre-weaning   | 27 d   | Firanor                                              | ↔                                 | ↔                                 | n.d.             | <sup>a</sup> p < 0.05 only for piglets receiving flavored starter weaned from sows receiving flavored feed; <sup>b</sup> Same comparison as above, no specific p given but trend described in text |
|                         |                        |        | Post-weaning  | 31 d   |                                                      | ↑ <sup>a</sup>                    | (↑) <sup>b</sup>                  | n.d.             |                                                                                                                                                                                                    |
| Silva 2018 [52]         | Different              | Pig    | Lactation     | 24 d   | Krave <sup>®</sup> AP in sow feed (2 concentrations) | ↑ <sup>a</sup>                    | ↔                                 | ↔                | <sup>a</sup> p < 0.001                                                                                                                                                                             |
|                         |                        |        | Pre-weaning   |        |                                                      | n.d.                              | ↑ <sup>a</sup>                    | ↑ <sup>b</sup>   | <sup>a</sup> p < 0.001 only for higher concentration; <sup>b</sup> p < 0.001                                                                                                                       |
| Fathi 2009 [53]         | Different              | Cattle | Pre-weaning   | ~ 60 d | Vanilla                                              | ↑ <sup>a</sup>                    | ↑ <sup>b</sup>                    | ↑ <sup>a</sup>   | <sup>a</sup> p = 0.03; <sup>b</sup> p = 0.01; <sup>c</sup> p = 0.02                                                                                                                                |
|                         |                        |        | Post-weaning  | ~ 21 d |                                                      | ↔                                 | ↔                                 | ↑ <sup>c</sup>   |                                                                                                                                                                                                    |
|                         |                        |        | Entire period | 81 d   |                                                      | ↑ <sup>c</sup>                    | ↔                                 | ↑ <sup>c</sup>   |                                                                                                                                                                                                    |
| Thomsen 1980 [54]       | Different              | Cattle | Pre-weaning   | 30 d   | Butter, Maple , Milk                                 | ↔                                 | ↑ <sup>a</sup>                    | n.d.             | <sup>a</sup> p < 0.05 only for maple-flavored starter; <sup>b</sup> p < 0.1 only for maple-flavored starter; <sup>c</sup> p < 0.1 only for milk-flavored starter                                   |
|                         |                        |        | Post-weaning  | 21 d   |                                                      | (↑) <sup>b</sup>                  | (↑) <sup>b</sup>                  | n.d.             |                                                                                                                                                                                                    |
|                         |                        |        | Entire period | 51 d   |                                                      | (↑) <sup>b</sup>                  | ↑ <sup>a</sup> , (↑) <sup>c</sup> | n.d.             |                                                                                                                                                                                                    |
| Torrallardona 2000 [55] | Different              | Pig    | Post-weaning  | 35 d   | Luctarom <sup>®</sup> (4 profiles)                   | ↔                                 | ↑ <sup>a</sup>                    | ↑ <sup>a</sup>   | <sup>a</sup> p = 0.01 all profiles combined compared to C                                                                                                                                          |

|                    |                         |           |        |              |                                                                                                                                      |                                                                                                          |                |                |                                                                                           |                                                                                                                                                         |
|--------------------|-------------------------|-----------|--------|--------------|--------------------------------------------------------------------------------------------------------------------------------------|----------------------------------------------------------------------------------------------------------|----------------|----------------|-------------------------------------------------------------------------------------------|---------------------------------------------------------------------------------------------------------------------------------------------------------|
| 3                  | Lv<br>2012 [56]         | Different | Pig    | 95 d         | 14 d                                                                                                                                 | Banana, Milk                                                                                             | ↔              | ↑ <sup>a</sup> | ↔                                                                                         | <sup>a</sup> p < 0.05                                                                                                                                   |
|                    | Dusel<br>2006 [57]      | Different | Cattle | Calves       | 70 d                                                                                                                                 | CuxArom Toffee<br>Vanilla                                                                                | ↔ <sup>a</sup> | ↑ <sup>b</sup> | (↑) <sup>c</sup>                                                                          | <sup>a</sup> Intake of feed with added<br>flavor only which was<br>restricted from day 43<br>onwards; <sup>b</sup> p = 0.045;<br><sup>c</sup> p = 0.078 |
|                    | Seabolt<br>2010 [44]    | Different | Pig    | Post-weaning | 35 d                                                                                                                                 | Creamy and milky<br>cheese profile with<br>sweet and vanilla<br>bottom notes<br>(Luctarom <sup>®</sup> ) | ↔              | ↔              | ↔                                                                                         | -                                                                                                                                                       |
|                    | McLaughlin<br>1983 [58] | Different | Pig    | Post-weaning | 35 d                                                                                                                                 | Cheese, Sweet-<br>molasses-caramel                                                                       | ↔              | ↔              | n.d.                                                                                      | -                                                                                                                                                       |
|                    |                         |           |        | Pre-weaning  | 8 d                                                                                                                                  | Cheese,<br>Commercial flavor,<br>Sweet-molasses-<br>caramel                                              | n.d.           | ↔              | ↔                                                                                         | -                                                                                                                                                       |
|                    |                         |           |        | Post-weaning | 35 d                                                                                                                                 |                                                                                                          | ↔              | ↔              | n.d.                                                                                      | -                                                                                                                                                       |
|                    | Sulabo<br>2010 [59]     | Different | Pig    | Pre-weaning  | 4 d                                                                                                                                  | Luctarom <sup>®</sup>                                                                                    | ↔              | ↔              | ↔                                                                                         | -                                                                                                                                                       |
|                    |                         |           |        | Post-weaning | 28 d                                                                                                                                 |                                                                                                          | ↔              | ↔              | ↔                                                                                         | -                                                                                                                                                       |
|                    | Danielsen<br>1981 [60]  | Different | Pig    | Pre-weaning  | 21 d                                                                                                                                 | Suk-aroma                                                                                                | ↔              | n.d.           | ↔                                                                                         | -                                                                                                                                                       |
| Post-weaning       |                         |           |        | 35 d         | ↔                                                                                                                                    |                                                                                                          | ↔              | ↔              | -                                                                                         |                                                                                                                                                         |
| Naim<br>1985 [61]  | Different <sup>#</sup>  | Rat       | n.d.   | 23 d         | Bacon, Beef, Bread,<br>Cheddar cheese,<br>Cheese paste,<br>Chicken, Chocolate,<br>Liver, Nacho<br>cheese, Peanut,<br>Salami, Vanilla | ↔                                                                                                        | ↔              | n.d.           | I group was exposed to<br>both flavored and<br>unflavored feed throughout<br>the I period |                                                                                                                                                         |
| Seitz<br>2020 [62] | Different               | Rat       | n.d.   | 21 d         | Peppermint                                                                                                                           | ↔                                                                                                        | ↓ <sup>a</sup> | n.d.           | <sup>a</sup> p < 0.05 observed at three<br>different flavor intensities                   |                                                                                                                                                         |

<sup>1</sup>Abbreviations used: C, Control; d, Days; I, Intervention; n.d., No data; n.p., Not possible due to study design; y, Years; ↑ indicates significant increase, ↓ significant decrease, ↔ no significant difference of intervention as compared to control, ( ) trend, i.e., p < 0.10 and/or authors describe trend in text; †Intervention and control at different time points with same animals (i.e., within-subject design); #More than one added flavor was fed during one experimental setting to animals in the intervention group; Different animals refers to between-subject design; If a time range for the intervention was given, the shortest period was chosen as duration of intervention; Half days were rounded off; Start and end days of the intervention were counted as full days; Intervention groups with additional sweeteners or without added flavors were excluded from the table.
